# Supplementary material for: Energy Use of Flux Salt Recovery Using Bipolar Membrane Electrodialysis for a CO2 Mineralisation Process
Source: MDPI journal article supplement (doi:10.3390/e21040395), 2019-04-12
Supplement: s1 [file s1]

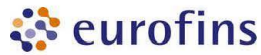

Tutkimustodistus AR-19-RZ-001240-01  
Päivämäärä 14.01.2019

Sivu 1/3

### Abo Akademi, water samples

|                                                          |                              |                              |                              |                              |                              |
|----------------------------------------------------------|------------------------------|------------------------------|------------------------------|------------------------------|------------------------------|
| Näyttenumero                                             | 750-2018-00026398            | 750-2018-00026399            | 750-2018-00026400            | 750-2018-00026401            | 750-2018-00026402            |
| Näytteen nimi                                            | A 28.11.18                   | B 28.11.18                   | C 28.11.18                   | A 13.12.18                   | B 13.12.18                   |
| Näytteen kuvaus                                          | Muut nestemäiset materiaalit | Muut nestemäiset materiaalit | Muut nestemäiset materiaalit | Muut nestemäiset materiaalit | Muut nestemäiset materiaalit |
| Yleiset vedestä tehtävät tutkimukset                     |                              |                              |                              |                              |                              |
| Ammonium (NH <sub>4</sub> )                              | RZC29 mg/l                   | 300                          | 35000                        |                              | 430                          |
| Sulfaatti (SO <sub>4</sub> )                             | RZB86 mg/l                   | 1500                         | 130000                       | 2300                         |                              |
| Alkuaineet, kokonaispitoisuus, HNO <sub>3</sub> , ICP-MS |                              |                              |                              |                              |                              |
| Magnesium (Mg)                                           | RZ01R mg/l                   |                              | 2100                         |                              |                              |
| Nikkeli (Ni)                                             | RZ01B mg/l                   |                              | 0,077                        |                              |                              |
| Rauta (Fe)                                               | RZ01G mg/l                   |                              | 540                          |                              |                              |
| Mikroaaltohajotus                                        | RZE24                        |                              | Tehty                        |                              |                              |
| Näyttenumero                                             | 750-2018-00026403            | 750-2018-00026404            | 750-2018-00026405            | 750-2018-00026406            | 750-2018-00026407            |
| Näytteen nimi                                            | C 13.12.18                   | A 19.12.18                   | B 19.12.18                   | C 19.12.18                   | A 20.12.18                   |
| Näytteen kuvaus                                          | Muut nestemäiset materiaalit | Muut nestemäiset materiaalit | Water                        | Water                        | Water                        |
| Yleiset vedestä tehtävät tutkimukset                     |                              |                              |                              |                              |                              |
| Ammonium (NH <sub>4</sub> )                              | RZC29 mg/l                   | 37000                        | 1700                         | 31000                        |                              |
| Sulfaatti (SO <sub>4</sub> )                             | RZB86 mg/l                   | 130000                       | 14000                        | 110000                       | 15000                        |
| Alkuaineet, kokonaispitoisuus, HNO <sub>3</sub> , ICP-MS |                              |                              |                              |                              |                              |
| Magnesium (Mg)                                           | RZ01R mg/l                   | 2800                         |                              | 2700                         |                              |
| Nikkeli (Ni)                                             | RZ01B mg/l                   | 27                           |                              | 26                           |                              |
| Rauta (Fe)                                               | RZ01G mg/l                   | 680                          |                              | 660                          |                              |
| Mikroaaltohajotus                                        | RZE24                        | Tehty                        |                              | Tehty                        |                              |
| Näyttenumero                                             | 750-2018-00026408            | 750-2018-00026409            | 750-2018-00026410            | 750-2018-00026411            | 750-2018-00026412            |
| Näytteen nimi                                            | B 20.12.18                   | C 20.12.18                   | Mg-rich 11.12.18             | Mg-rich 19.12.18             | Mg-rich L2 20.12.18          |
| Näytteen kuvaus                                          | Water                        | Water                        | Water                        | Water                        | Water                        |
| Yleiset vedestä tehtävät tutkimukset                     |                              |                              |                              |                              |                              |
| Ammonium (NH <sub>4</sub> )                              | RZC29 mg/l                   | 3900                         | 35000                        |                              |                              |
| Sulfaatti (SO <sub>4</sub> )                             | RZB86 mg/l                   |                              | 130000                       | 130000                       | 14000                        |
| Alkuaineet, kokonaispitoisuus, HNO <sub>3</sub> , ICP-MS |                              |                              |                              |                              |                              |

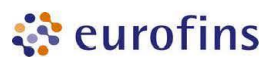

Tutkimustodistus AR-19-RZ-001240-01

Sivu 2/3

Päivämäärä 14.01.2019

| Näyttenumero      | 750-2018-00026408 | 750-2018-00026409 | 750-2018-00026410 | 750-2018-00026411 | 750-2018-00026412   |
|-------------------|-------------------|-------------------|-------------------|-------------------|---------------------|
| Näytteen nimi     | B 20.12.18        | C 20.12.18        | Mg-rich 11.12.18  | Mg-rich 19.12.18  | Mg-rich L2 20.12.18 |
| Näytteen kuvaus   | Water             | Water             | Water             | Water             | Water               |
| Magnesium (Mg)    | RZ01R mg/l        | 2700              | 2900              | 2700              | 2200                |
| Nikkeli (Ni)      | RZ01B mg/l        | 26                | 27                | 26                | 21                  |
| Rauta (Fe)        | RZ01G mg/l        | 660               | 690               | 640               | 290                 |
| Mikroaaltohojotus | RZE24             | Tehty             | Tehty             | Tehty             | Tehty               |

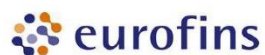

Tutkimustodistus AR-19-RZ-001240-01

Sivu 3/3

Päivämäärä 14.01.2019

## Menetelmätiedot

| Testikoodi                                               | Parametrin nimi              | Menetelmän<br>mittausepävarmuus | Menetelmän<br>määrittäysraja | Akkreditoitu | Menetelmä                               | Laboratorio |
|----------------------------------------------------------|------------------------------|---------------------------------|------------------------------|--------------|-----------------------------------------|-------------|
| Yleiset vedestä tehtävät tutkimukset                     |                              |                                 |                              |              |                                         |             |
| RZC29                                                    | Ammonium (NH <sub>4</sub> )  | 20%(<13mg/l)<br>10%(=13mg/l)    | 2                            | Kyllä        | Sis. men. EF2034, Kjeldahl<br>(titraus) | RZ T039     |
| RZB86                                                    | Sulfaatti (SO <sub>4</sub> ) | 12%(<4mg/l)<br>10%(>4mg/l)      | 0.5                          | Kyllä        | Sis. men. EF2018, IC-EC                 | RZ T039     |
| Alkuaineet, kokonaispitoisuus, HNO <sub>3</sub> , ICP-MS |                              |                                 |                              |              |                                         |             |
| RZ0IR                                                    | Magnesium (Mg)               | 20%                             | 0.1                          | Kyllä        | SFS-EN ISO 17294-2                      | RZ T039     |
| RZ0IB                                                    | Nikkeli (Ni)                 | 20%                             | 0.003                        | Kyllä        | SFS-EN ISO 17294-2                      | RZ T039     |
| RZ0IG                                                    | Rauta (Fe)                   | 20%                             | 0.025                        | Kyllä        | SFS-EN ISO 17294-2                      | RZ T039     |
| RZE24                                                    | Mikroaaltohajotus            |                                 |                              | Kyllä        | SFS-EN ISO 15587-2                      | RZ T039     |

## Laboratorio

RZ T039 Eurofins Environment Testing Finland (Lahti)

FINAS akkr. num. SFS-EN ISO/IEC 17025:2005 FINAS T039

## Menetelmäkuvaukset

SFS-EN ISO 15587-2

SFS-EN ISO 17294-2

Sis. men. EF2018

Sis. men. EF2034

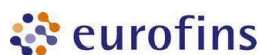

Analytical Report Nr. AR-19-RZ-003618-02  
Date 18.02.2019

Page 1/2

### Åbo Akademi, water samples

|                    |                   |                   |                           |                   |                   |
|--------------------|-------------------|-------------------|---------------------------|-------------------|-------------------|
| Sample number      | 750-2019-00003728 | 750-2019-00003729 | 750-2019-00003730         | 750-2019-00003731 | 750-2019-00003732 |
| Sample reference   | Conc in 17.1.2019 | Cell 1 17.1.2019  | Cell 2 NH4OH<br>17.1.2019 | Cell 3 17.1.2019  | Cell 1 18.1.2019  |
| Sample description | Water             | Water             | Water                     | Water             | Water             |

#### General analyses of water

|                |       |      |       |       |       |       |       |
|----------------|-------|------|-------|-------|-------|-------|-------|
| Sulphate (SO4) | RZB86 | mg/l | 85000 | 99000 | 32000 | 84000 | 16000 |
| Ammonium (NH4) | RZC29 | mg/l | 60000 | 56000 | 20000 | 45000 | 6600  |

|                    |                   |                   |                   |                   |                           |
|--------------------|-------------------|-------------------|-------------------|-------------------|---------------------------|
| Sample number      | 750-2019-00003733 | 750-2019-00003734 | 750-2019-00003735 | 750-2019-00003736 | 750-2019-00003737         |
| Sample reference   | Cell 2 18.1.2019  | Cell 3 18.1.2019  | Cell 1 22.1.2019  | Cell 2 22.1.2019  | Cell 1 "H2O"<br>23.1.2019 |
| Sample description | Water             | Water             | Water             | Water             | Water                     |

#### General analyses of water

|                |       |      |       |      |      |      |       |
|----------------|-------|------|-------|------|------|------|-------|
| Sulphate (SO4) | RZB86 | mg/l | 14000 | 1000 | 7800 | 63   | 10000 |
| Ammonium (NH4) | RZC29 | mg/l | 8800  | 3300 | 6300 | 4200 | 800   |

|                    |                          |                           |
|--------------------|--------------------------|---------------------------|
| Sample number      | 750-2019-00003738        | 750-2019-00003739         |
| Sample reference   | Cell 2 conc<br>23.1.2019 | Cell 3 NH4OH<br>23.1.2019 |
| Sample description | Water                    | Water                     |

#### General analyses of water

|                |       |      |      |      |
|----------------|-------|------|------|------|
| Sulphate (SO4) | RZB86 | mg/l | 3000 | 56   |
| Ammonium (NH4) | RZC29 | mg/l | 6400 | 5200 |



Analytical Report Nr. AR-19-RZ-003618-02

Page 2/2

Date 18.02.2019

**Method information**

| Testcode                         | Parameter name              | Default MU                   | Default LOQ | Accredited | Method                                                              | Laboratory |
|----------------------------------|-----------------------------|------------------------------|-------------|------------|---------------------------------------------------------------------|------------|
| <b>General analyses of water</b> |                             |                              |             |            |                                                                     |            |
| RZB86                            | Sulphate (SO <sub>4</sub> ) | 12%(<4mg/l)<br>10%(>4mg/l)   | 0.5         | Yes        | Int. Method, IC, based on e.g.<br>SFS-EN ISO 10304-1:2009,<br>IC-EC | RZ T039    |
| RZC29                            | Ammonium (NH <sub>4</sub> ) | 20%(<13mg/l)<br>10%(=13mg/l) | 2           | Yes        | SFS 5505:1988 mod.                                                  | RZ T039    |

**Laboratory**

|         |                                              |                                                     |
|---------|----------------------------------------------|-----------------------------------------------------|
| RZ T039 | Eurofins Environment Testing Finland (Lahti) | FINAS acc num. SFS-EN ISO/IEC 17025:2005 FINAS T039 |
|---------|----------------------------------------------|-----------------------------------------------------|

**Method**

Int. Method, IC, based on e.g.  
SFS-EN ISO 10304-1:  
SFS 5505:1988 mod.
